# Supplementary material for: Bioactive Compounds in Garlic (Allium sativum) and Black Garlic as Antigout Agents, Using Computer Simulation
Source: MDPI journal article supplement (doi:10.3390/life12081131), 2022-07-27
Supplement: s1 [file s1]

# **Bioactive Compounds in Garlic (*Allium sativum*) and Black Garlic as Antigout Based on in Silico Approach**

## **Supplementary Material**

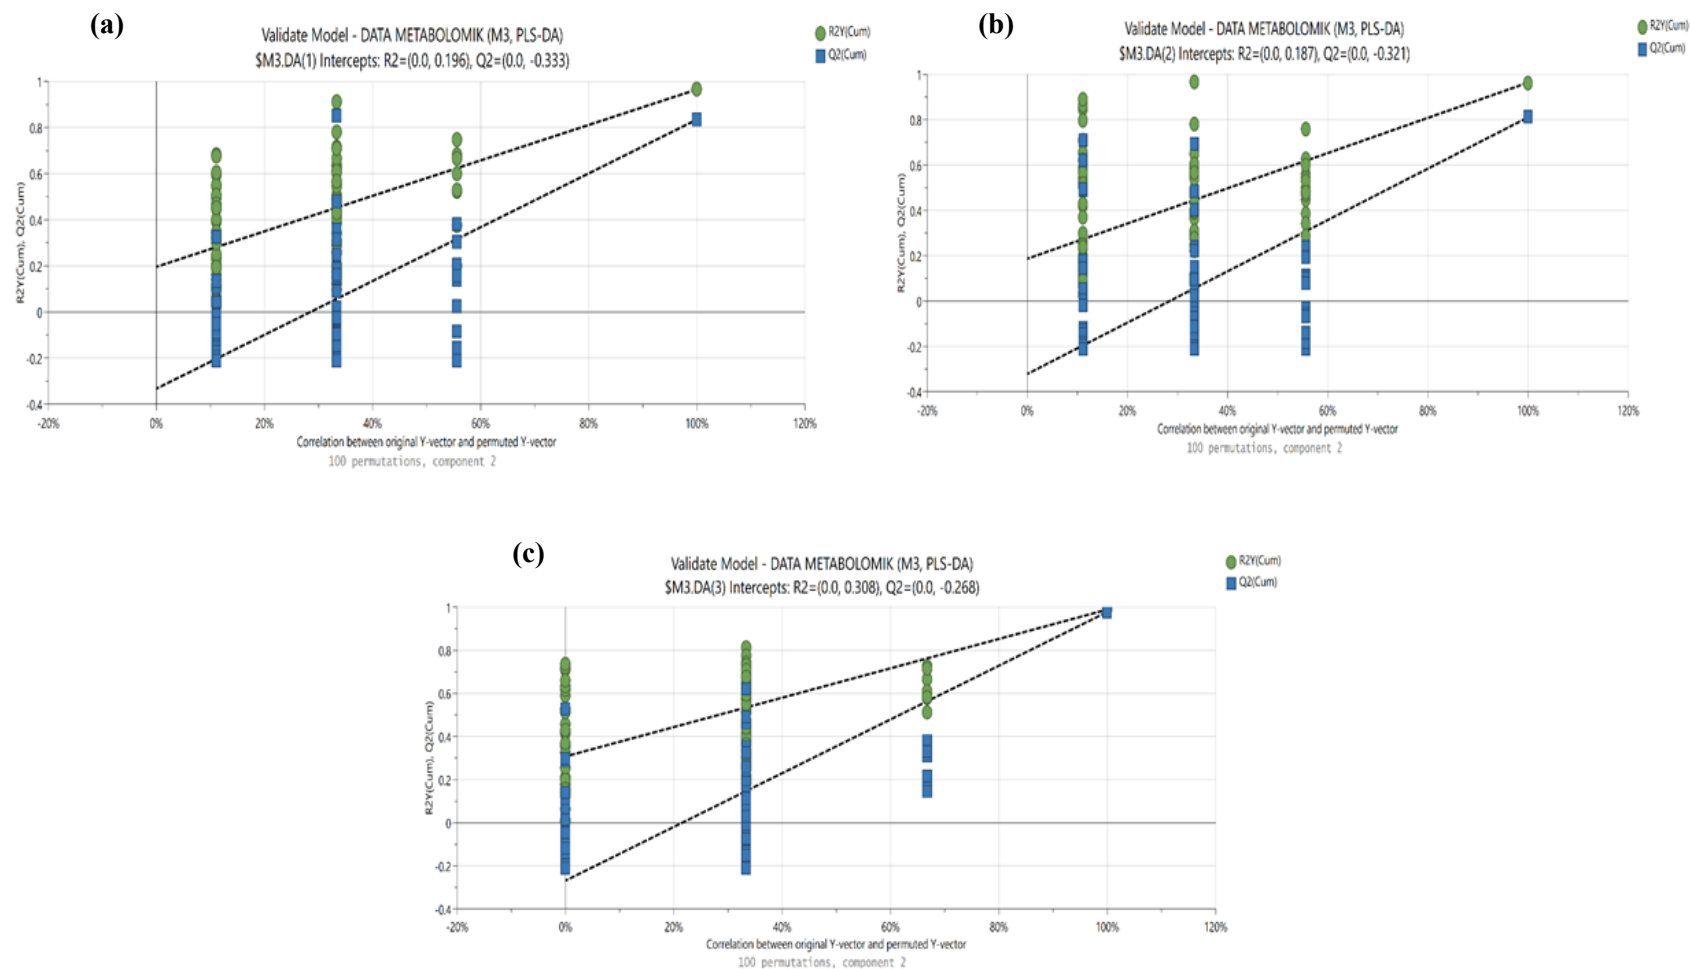

**Figure S1** Permutation test for the PLS-DA model with (a) imported black garlic; (b) local black garlic; (c) imported and local garlic

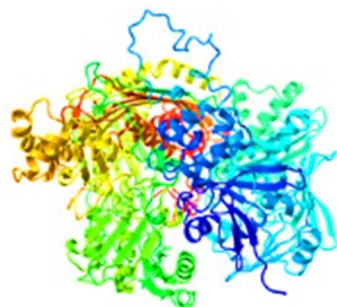

**Xanthine Oxidase**  
(PDB ID: 2E1Q)

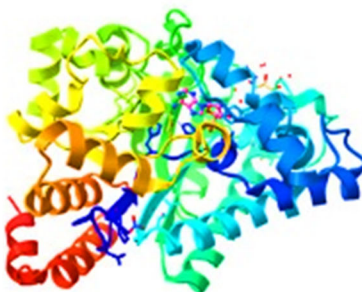

**Adenine Deaminase**  
(PDB ID: 3IAR)

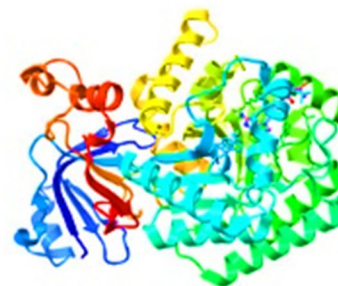

**Guanine Deaminase**  
(PDB ID: 4AQL)

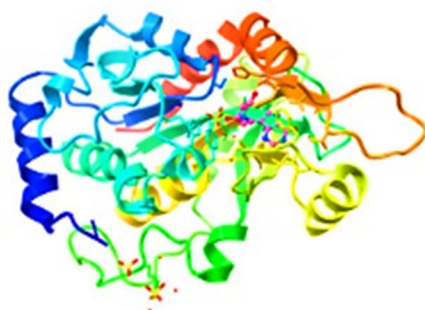

**Purine Nucleoside Phosphorylase**  
(PDB ID: 1RSZ)

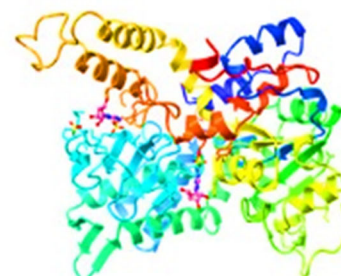

**5-Nucleotidase II**  
(PDB ID: 2JC9)

**Figure S2** Target protein 3D picture

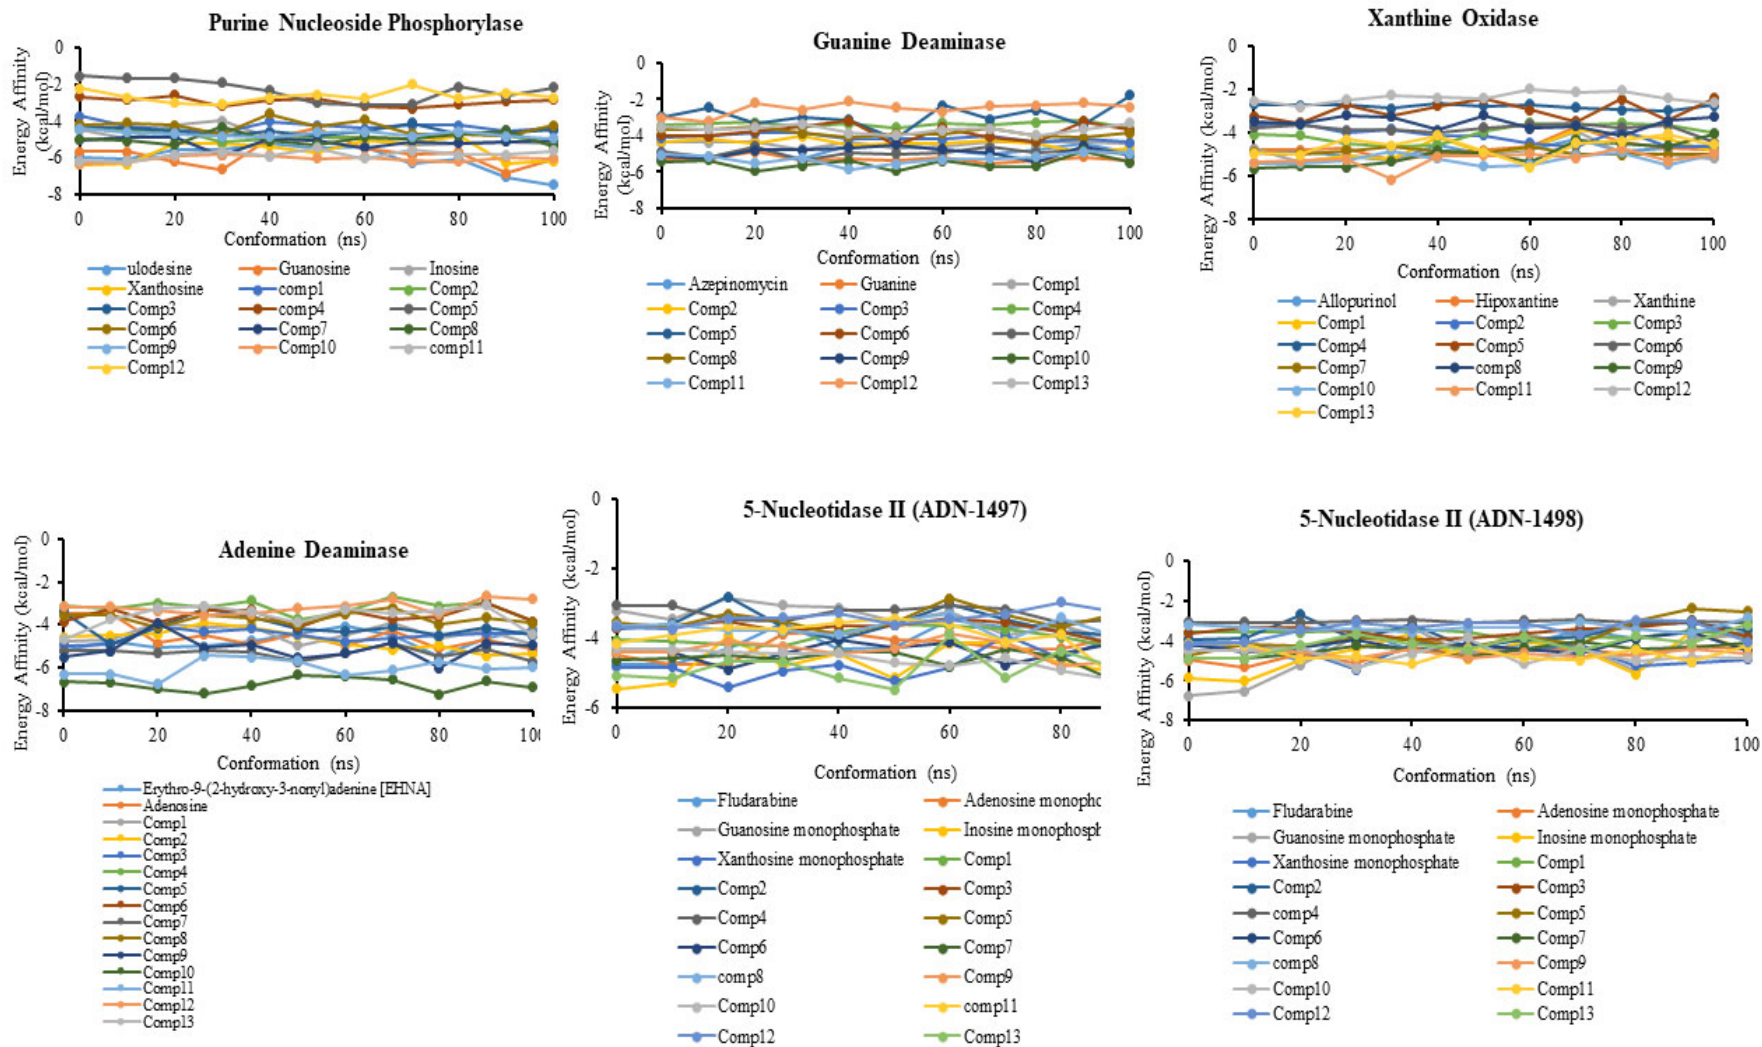

**Figure S3** Protein conformation from ensemble docking

# Information

| Ligand | Name                                         |
|--------|----------------------------------------------|
| Comp1  | Diallyl thiosulfinate (Allicin)              |
| Comp2  | Alliin                                       |
| Comp3  | <i>S</i> -Allyl-L-cysteine                   |
| Comp4  | Diallyl disulfide                            |
| Comp5  | $\gamma$ -Glutamyl- <i>S</i> -Allyl-Cysteine |
| Comp6  | N-Acetyl- <i>S</i> -Allyl-L-Cysteine         |
| Comp7  | ( <i>E</i> )-Ajoene                          |
| Comp8  | 5-hydroxymethyl-2-furaldehyde                |
| Comp9  | Pyridoxal                                    |
| Comp10 | Pyridoxamine                                 |
| Comp11 | D-Glucosamine                                |
| Comp12 | DL-Carnitin                                  |
| Comp13 | 4-Guanidinobutyric acid                      |

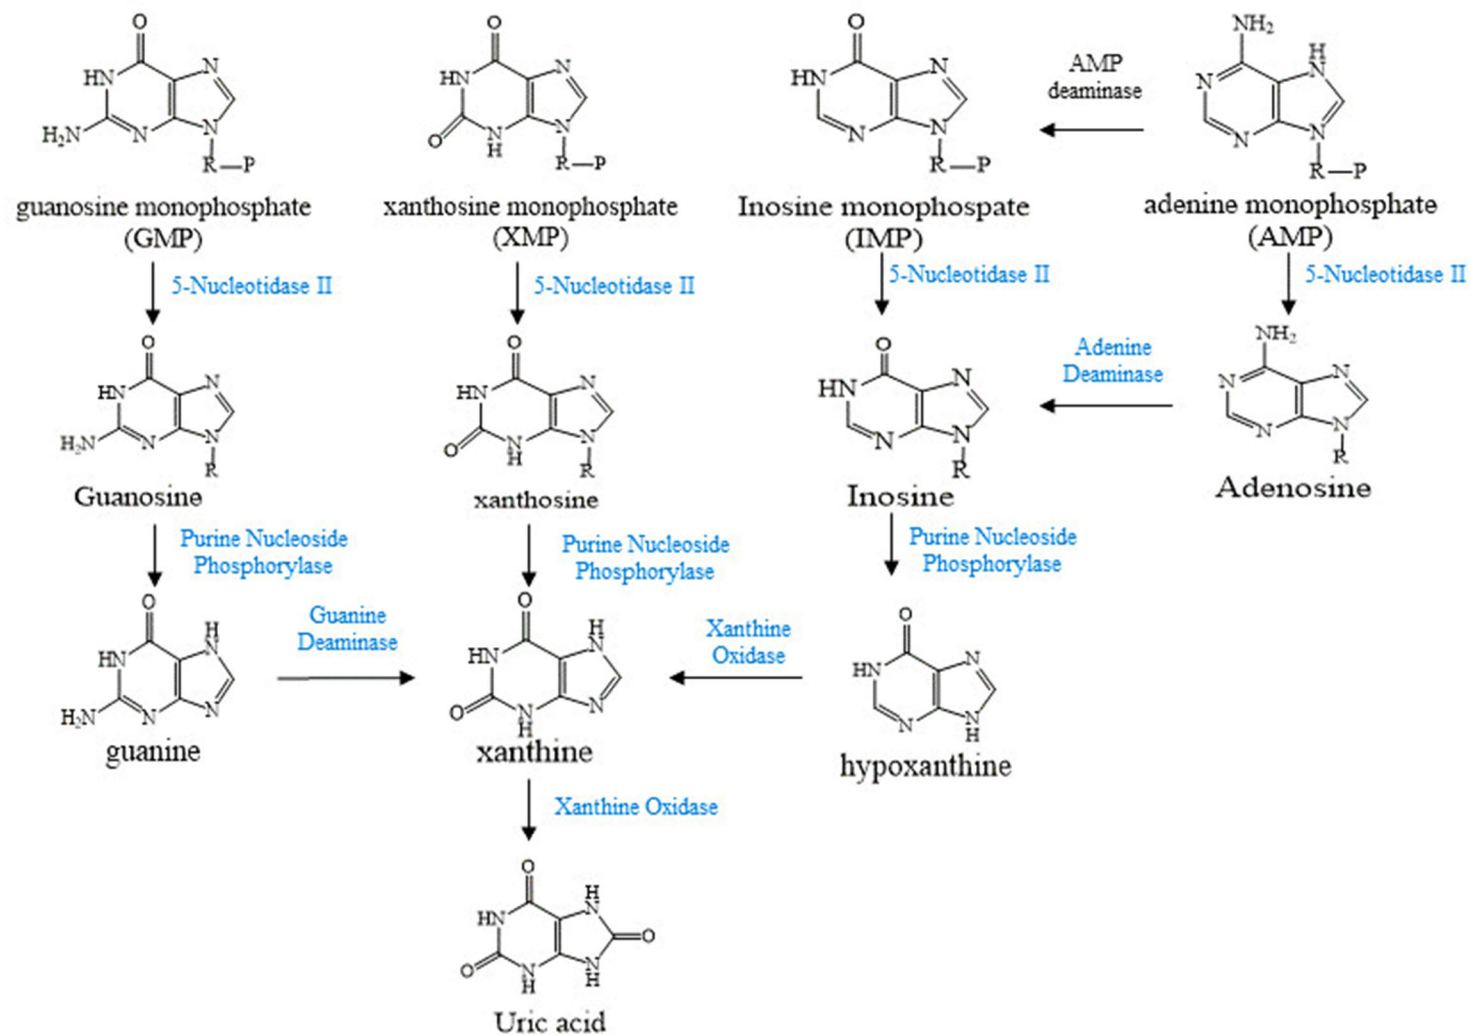

**Figure S4** Uric acid biosynthesis mechanism

**Table S1** Test and reference ligands

| Ligands                                         | Reference ligands        |                                           |
|-------------------------------------------------|--------------------------|-------------------------------------------|
|                                                 | Substrate                | Commercial                                |
| 1. Diallyl thiosulfinate (Allicin)              | Xanthine                 | Allopurinol                               |
| 2. Alliin                                       | Hypoxanthine             | Erythro-9-(2-hydroxy-nonyl)adenine [EHNA] |
| 3. <i>S</i> -allyl-L-cysteine                   | Adenosine                | Azepinomycin                              |
| 4. Diallyl disulfide                            | Guanine                  | Ulodesine                                 |
| 5. $\gamma$ -Glutamyl- <i>S</i> -allyl-cysteine | Guanosine                | Fludarabine                               |
| 6. N-acetyl- <i>S</i> -allyl-L-cysteine         | Inosine                  |                                           |
| 7. ( <i>E</i> )-Ajoene                          | Xanthosine               |                                           |
| 8. 5-hydroxymethyl-2-furaldehyde                | Adenosine monophosphate  |                                           |
| 9. Pyridoxal                                    | Guanosine monophosphate  |                                           |
| 10. Pyridoxamine                                | Inosine monophosphate    |                                           |
| 11. DL-Carnitine                                | Xanthosine monophosphate |                                           |
| 12. 4-Guanidinobutyric acid                     |                          |                                           |
| 13. D-Glucosamine                               |                          |                                           |



**Table S2** Putative identification of metabolite present in extract fresh garlic (FG) (import and local) and black garlic (BG) (import and local) using LC-MS/MS in positive ionization mode

| RT<br>[min] | Metabolite name | Molecul<br>formula                                           | MW       | Error<br>mass<br>[ppm] | MS-MS2<br>Fragmentation                     | Abundance (%)                      |                                              |                                    |                                   | Sample       |              |             |             |  |  |
|-------------|-----------------|--------------------------------------------------------------|----------|------------------------|---------------------------------------------|------------------------------------|----------------------------------------------|------------------------------------|-----------------------------------|--------------|--------------|-------------|-------------|--|--|
|             |                 |                                                              |          |                        |                                             | FG Import                          | BG Import                                    | FG Local                           | BG Local                          | FG<br>Import | BG<br>Import | FG<br>Local | BG<br>Local |  |  |
| Amino Acid  |                 |                                                              |          |                        |                                             |                                    |                                              |                                    |                                   |              |              |             |             |  |  |
| 1.06        | L-histidine     | C <sub>6</sub> H <sub>9</sub> N <sub>3</sub> O <sub>2</sub>  | 155.0691 | -2,71                  | 156.07616,<br>110.07117, 83.06061           | 0,8082 ±<br>0,20073 <sup>b</sup>   | 0,0398 ±<br>0,1579 <sup>a</sup>              | 0,7234 ±<br>0,2055 <sup>b</sup>    | 0,0470 ±<br>0,1553 <sup>a</sup>   | ✓            | *            | ✓           | *           |  |  |
| 1.29        | Valine          | C <sub>5</sub> H <sub>11</sub> NO <sub>2</sub>               | 117,0788 | -1,43                  | 118.08585, 72.08111                         | 1,6213 ±<br>2,75194 <sup>a</sup>   | 1,0980 ±<br>1,71216 <sup>a</sup>             | 1,7147 ±<br>1,46967 <sup>a</sup>   | 3,3720 ±<br>2,85011 <sup>a</sup>  | ✓            | ✓            | ✓           | ✓           |  |  |
| 2.09        | D-(+)-Proline   | C <sub>5</sub> H <sub>9</sub> NO <sub>2</sub>                | 115,0632 | -1,15                  | 116.07034, 70.06540                         | 0,0240 ±<br>0,1229 <sup>a</sup>    | 0,2147 ±<br>0,17182 <sup>b</sup>             | 0,0140 ±<br>0,1217 <sup>a</sup>    | 0,3673 ±<br>0,10471 <sup>b</sup>  | *            | ✓            | *           | ✓           |  |  |
| 4.33        | L-Phenylalanine | C <sub>9</sub> H <sub>11</sub> NO <sub>2</sub>               | 165,0783 | -3,88                  | 166.08568,<br>120.08053                     | 0,6240 ±<br>0,1778 <sup>b,c</sup>  | 0,6847 ±<br>0,10281 <sup>c</sup>             | 0,4967 ±<br>0,10372 <sup>a,b</sup> | 0,4697 ±<br>0,03317 <sup>a</sup>  | ✓            | ✓            | ✓           | ✓           |  |  |
| 1.08        | L-(+)-Arginine  | C <sub>6</sub> H <sub>14</sub> N <sub>4</sub> O <sub>2</sub> | 174,1111 | -3,54                  | 175.11852,<br>158.09204,<br>130.09726       | 24,3823 ±<br>3,0774 <sup>a,b</sup> | 30,3920 ±<br>4,6530 <sup>b,c</sup>           | 34,8547 ±<br>4,75181 <sup>c</sup>  | 17,9117 ±<br>1,42333 <sup>a</sup> | ✓            | *            | ✓           | *           |  |  |
| 1.51        | L-Isoleucine    | C <sub>6</sub> H <sub>13</sub> NO <sub>2</sub>               | 131,0943 | -2,77                  | 132.10127, 86.09663                         | 2,9360 ±<br>3,19383 <sup>a</sup>   | 6,4793 ±<br>3,73368 <sup>a</sup>             | 1,4097 ±<br>2,41048 <sup>a</sup>   | 8,2017 ±<br>9,89227 <sup>a</sup>  | ✓            | ✓            | *           | ✓           |  |  |
| 1.50        | Guanine         | C <sub>5</sub> H <sub>5</sub> N <sub>5</sub> O               | 151,049  | -2,83                  | 152.05818,<br>135.02985                     | 0,0583 ±<br>0,0089 <sup>a,b</sup>  | 0,3004 ±<br>0,03957 <sup>c</sup>             | 0,0155 ±<br>0,01541 <sup>a</sup>   | 0,2334 ±<br>0,1989 <sup>b,c</sup> | *            | ✓            | *           | ✓           |  |  |
| 1.14        | DL-Glutamine    | C <sub>5</sub> H <sub>10</sub> N <sub>2</sub> O <sub>3</sub> | 146,0688 | -2,58                  | 147.07600,<br>130.04962, 84.04459           | 0,7520 ±<br>0,51125 <sup>a</sup>   | 0,7120 ±<br>0,17724 <sup>a</sup>             | 1,0733 ±<br>0,48564 <sup>a</sup>   | 0,7707 ±<br>0,4015 <sup>a</sup>   | ✓            | ✓            | ✓           | ✓           |  |  |
| 1.13        | L-Glutamic acid | C <sub>5</sub> H <sub>9</sub> NO <sub>4</sub>                | 147,0528 | -2,78                  | 148.0615, 130.04961,<br>102.05501, 84.04458 | 0,6780 ±<br>0,24318 <sup>a</sup>   | 0,677 <sup>2</sup> ±<br>0,18988 <sup>a</sup> | 1, 4570 ±<br>0,14490 <sup>b</sup>  | 1,6005 ±<br>0,23511 <sup>b</sup>  | *            | *            | ✓           | ✓           |  |  |
| 1.12        | L-(-)-Threonine | C <sub>4</sub> H <sub>9</sub> NO <sub>3</sub>                | 119,0582 | -0,47                  | 120.06552,<br>102.05497                     | 0,1976 ±<br>0,03290 <sup>a</sup>   | 0,2101 ±<br>0,0232 <sup>a,b</sup>            | 0,3791 ±<br>0,17768 <sup>b,c</sup> | 0,4906 ±<br>0,02960 <sup>c</sup>  | ✓            | ✓            | ✓           | ✓           |  |  |
| 2.08        | L-Tirosine      | C <sub>9</sub> H <sub>11</sub> NO <sub>3</sub>               | 181,0732 | -3,68                  | 182.08064,<br>136.07593,<br>119.04916       | 0,0070 ±<br>0,0010 <sup>a</sup>    | 0,2940 ±<br>0,31090 <sup>a</sup>             | 0,0053 ±<br>0,00289 <sup>a</sup>   | 0,2423 ±<br>0,14468 <sup>a</sup>  | *            | ✓            | *           | ✓           |  |  |

| RT<br>[min]    | Metabolite name                                  | Molecul<br>formula                                | MW       | Error<br>mass<br>[ppm] | MS-MS2<br>Fragmentation               | Abundance (%)                     |                                   |                                    |                                   | Sample       |              |             |             |
|----------------|--------------------------------------------------|---------------------------------------------------|----------|------------------------|---------------------------------------|-----------------------------------|-----------------------------------|------------------------------------|-----------------------------------|--------------|--------------|-------------|-------------|
|                |                                                  |                                                   |          |                        |                                       | FG Import                         | BG Import                         | FG Local                           | BG Local                          | FG<br>Import | BG<br>Import | FG<br>Local | BG<br>Local |
| 2.51           | Tyramine                                         | C <sub>8</sub> H <sub>11</sub> NO                 | 137,0838 | -2,11                  | 138.09076, 94.06528,<br>65.03899      | 0,0017 ±<br>0,00115 <sup>a</sup>  | 0,0540 ±<br>0,00781 <sup>a</sup>  | 0,0020 ±<br>0,00173 <sup>a</sup>   | 0,1733 ±<br>0,07295 <sup>b</sup>  | *            | ✓            | *           | ✓           |
| 9.91           | LysoPC<br>(18:3(9Z,12Z,15Z))                     | C <sub>26</sub> H <sub>48</sub> NO <sub>7</sub> P | 517,3141 | -5,38                  | 518.32190,<br>414.03827               | 0,0030 ±<br>0,00173 <sup>a</sup>  | 0,1563 ±<br>0,04868 <sup>b</sup>  | 0,0023 ±<br>0,00153 <sup>a</sup>   | 0,3023 ±<br>0,12231 <sup>c</sup>  | *            | ✓            | *           | ✓✓          |
| Organic sulfur |                                                  |                                                   |          |                        |                                       |                                   |                                   |                                    |                                   |              |              |             |             |
| 6.66           | Diallyl<br>thiosulfinate<br>(Allicin)            | C <sub>6</sub> H <sub>10</sub> OS <sub>2</sub>    | 162,0167 | -3,98                  | 163.02380, 73.01093                   | 20,3953 ±<br>8,15248 <sup>b</sup> | 0,0073 ±<br>0,00231 <sup>a</sup>  | 18,8753 ±<br>5,26397 <sup>b</sup>  | 0,1017 ±<br>0,08297 <sup>a</sup>  | ✓            | *            | ✓           | ✓           |
| 1.24           | Alliin                                           | C <sub>6</sub> H <sub>11</sub> NO <sub>3</sub> S  | 177,0452 | -4,49                  | 178.05237,<br>159.07625,<br>117.07405 | 16,4463 ±<br>8,45083 <sup>b</sup> | 1,4203 ±<br>0,85162 <sup>a</sup>  | 9,2650 ±<br>7,96354 <sup>a,b</sup> | 2,0773 ±<br>1,26253 <sup>a</sup>  | ✓            | *            | ✓           | *           |
| 1.67           | <i>S</i> -Allyl-L-cysteine                       | C <sub>6</sub> H <sub>11</sub> NO <sub>2</sub> S  | 161,0504 | -3,75                  | 162.05794,<br>145.03139, 73.01095     | 0,8373 ±<br>0,06824 <sup>a</sup>  | 19,2553 ±<br>6,92564 <sup>b</sup> | 0,4540 ±<br>0,26678 <sup>a</sup>   | 14,3533 ±<br>0,30994 <sup>b</sup> | ✓            | ✓            | ✓           | ✓           |
| 5.24           | Diallyl disulfide                                | C <sub>6</sub> H <sub>10</sub> S <sub>2</sub>     | 146,0223 | -0,83                  | 147.02942,<br>104.98278, 73.01100     | 0,0003 ±<br>0,00058 <sup>a</sup>  | 0,0487 ±<br>0,01823 <sup>b</sup>  | 0,0010 ±<br>0,00173 <sup>a</sup>   | 0,0400 ±<br>0,01311 <sup>b</sup>  | *            | ✓            | *           | ✓           |
| 3.99           | <i>γ</i> -Glutamyl- <i>S</i> -<br>Allyl-Cysteine | C <sub>11</sub> H <sub>18</sub> N <sub>2</sub> OS | 290,0939 | 0,76                   | 291.09979,<br>145.03149, 73.02099     | 13,2880 ±<br>9,59068 <sup>a</sup> | 2,7293 ±<br>1,55445 <sup>a</sup>  | 12,5223 ±<br>9,59599 <sup>a</sup>  | 4,6327 ±<br>3,95886 <sup>a</sup>  | ✓            | ✓            | ✓           | ✓           |
| 2.79           | N-Acetyl- <i>S</i> -Allyl-<br>L-Cysteine         | C <sub>8</sub> H <sub>13</sub> NO <sub>3</sub> S  | 203,061  | -2,95                  | 204.06837,<br>186.05811,<br>112.07571 | 0,0002 ±<br>0,00023 <sup>a</sup>  | 0,2442 ±<br>0,03901 <sup>c</sup>  | 0,0001 ±<br>0,0006 <sup>a</sup>    | 0,0669 ±<br>0,02199 <sup>b</sup>  | *            | ✓✓           | *           | ✓           |
| 8.40           | ( <i>E</i> )-Ajoene                              | C <sub>9</sub> H <sub>14</sub> OS <sub>3</sub>    | 234,0199 | -3,5                   | 235.02629,<br>195.04268               | 0,3617 ±<br>0,11064 <sup>b</sup>  | 0,0010 ±<br>0,00100 <sup>a</sup>  | 0,3140 ±<br>0,18824 <sup>b</sup>   | 0,0037 ±<br>0,00306 <sup>a</sup>  | ✓            | *            | ✓           | *           |
| RT<br>[min]    | Metabolite name                                  | Molecul<br>formula                                | MW       |                        | MS-MS2<br>Fragmentation               | Abundance (%)                     |                                   |                                    |                                   | Sample       |              |             |             |

|                     |                                  |                                                              |          | Error<br>mass<br>[ppm] |                                                 | FG Import                       | BG Import                           | FG Local                            | BG Local                          | FG<br>Import | BG<br>Import | FG<br>Local | BG<br>Local |
|---------------------|----------------------------------|--------------------------------------------------------------|----------|------------------------|-------------------------------------------------|---------------------------------|-------------------------------------|-------------------------------------|-----------------------------------|--------------|--------------|-------------|-------------|
| <b>Phenolic</b>     |                                  |                                                              |          |                        |                                                 |                                 |                                     |                                     |                                   |              |              |             |             |
| 1,52                | <i>p</i> -Coumaric acid          | C <sub>9</sub> H <sub>8</sub> O <sub>3</sub>                 | 164,0468 | -3,21                  | 165.05394,<br>147.04356,<br>120.08871           | 2,7060<br>2,87608 <sup>a</sup>  | ± 1,4903<br>1,65644 <sup>a</sup>    | ± 1,0807<br>0,37321 <sup>a</sup>    | ± 1,4493<br>1,19021 <sup>a</sup>  | √            | √            | √           | √           |
| <b>Organic acid</b> |                                  |                                                              |          |                        |                                                 |                                 |                                     |                                     |                                   |              |              |             |             |
| 2.31                | Pyridoxal                        | C <sub>8</sub> H <sub>9</sub> NO <sub>3</sub>                | 167,0577 | -3,02                  | 168.06493,<br>122,05997, 94.06530               | 0,0020<br>0,0010 <sup>a</sup>   | ± 0,2933<br>0,04576 <sup>b</sup>    | ± 0,0017<br>0,00115 <sup>a</sup>    | ± 0,3270<br>0,10058 <sup>b</sup>  | *            | √            | *           | √           |
| 2.87                | Pyridoxamine                     | C <sub>8</sub> H <sub>12</sub> N <sub>2</sub> O <sub>2</sub> | 168,0894 | -3,14                  | 169.09628,<br>151.08621,<br>121.08408           | 0,0010<br>0,00035 <sup>a</sup>  | ± 0,1317<br>0,01801 <sup>b</sup>    | ± 0,0007<br>0,00067 <sup>a</sup>    | ± 0,1247<br>0,02775 <sup>b</sup>  | *            | √            | *           | √           |
| 2.95                | 5-Hydroxymethyl-<br>2-furadehide | C <sub>6</sub> H <sub>6</sub> O <sub>3</sub>                 | 126,0315 | -1,71                  | 127.03864,<br>109.02843, 81.03377               | 0,0200<br>0,00781 <sup>a</sup>  | ± 0,2550<br>0,26831 <sup>a</sup>    | ± 0,0233<br>0,01401 <sup>a</sup>    | ± 1,9093<br>0,53938 <sup>b</sup>  | *            | √            | *           | √           |
| <b>Other</b>        |                                  |                                                              |          |                        |                                                 |                                 |                                     |                                     |                                   |              |              |             |             |
| 2.20                | Choline                          | C <sub>5</sub> H <sub>13</sub> NO                            | 103,0977 | 0,07                   | 104.10687, 60.08119                             | 13,5257<br>2,83329 <sup>a</sup> | ± 22,9997<br>2,81381 <sup>b,c</sup> | ± 15,0937<br>2,98501 <sup>a,b</sup> | ± 30,0190<br>7,49419 <sup>c</sup> | √            | √            | √           | √           |
| 1.40                | DL-Carnitin                      | C <sub>7</sub> H <sub>15</sub> NO <sub>3</sub>               | 161,1047 | -2,99                  | 162.11185,<br>146.09215,<br>104.07071, 60.05610 | 0,1563<br>0,06741 <sup>a</sup>  | ± 0,4263<br>0,00451 <sup>b</sup>    | ± 0,0733<br>0,02836 <sup>a</sup>    | ± 0,3910<br>0,16029 <sup>b</sup>  | *            | √            | *           | √           |
| 1.38                | 4-Guanidinobutyric<br>acid       | C <sub>5</sub> H <sub>11</sub> N <sub>3</sub> O <sub>2</sub> | 145,0846 | -3,47                  | 146.09178, 87.04431,<br>60.05610                | 0,1147<br>0,05107 <sup>a</sup>  | ± 3,5023<br>0,85523 <sup>b</sup>    | ± 0,0997<br>0,02829 <sup>a</sup>    | ± 3,5920<br>1,62896 <sup>b</sup>  | *            | √            | *           | √           |
| 2.71                | D-Glucosamine                    | C <sub>6</sub> H <sub>13</sub> NO <sub>5</sub>               | 179,0787 | -3,77                  | 180.08491,<br>162.07579, 84.04467               | 0,0510<br>0,01082 <sup>a</sup>  | ± 5,8823<br>0,66678 <sup>b</sup>    | ± 0,0473<br>0,04908 <sup>a</sup>    | ± 6,7293<br>1,68879 <sup>b</sup>  | *            | √            | *           | √           |

Numbers followed by the same letter represent values that are not significantly different ( $p > 0.05$ ), √ (Detected), \* (Not Detected)

**Table S3** ligand-receptor complex interactions result ensemble docking

| Compunds<br>(Conformation) | BE<br>(kcal/mol) | Hydrophobic interactions                                                                                             | Hydrogen bond interactions (distance, Å)                                                     |
|----------------------------|------------------|----------------------------------------------------------------------------------------------------------------------|----------------------------------------------------------------------------------------------|
| <b>XDH</b>                 |                  |                                                                                                                      |                                                                                              |
| ( <i>E</i> )-Ajoene (0)    | -4,92            | Gln872, Asp873, Leu874, Val1012, Phe1010, Leu1015, Ala911, Ile878, Phe915, Ser875, Gln876                            | Ser877 (2.68)                                                                                |
| ( <i>E</i> )-Ajoene (8)    | -5,03            | Asn769, Thr1075, Lys772, Ala1079, Val803, Arg881, Phe1010, Ser877, Pro1077, Leu874, Phe915, Ala1080, Leu1015, Met771 | -                                                                                            |
| Pyridoxamine (0)           | -5,42            | Pro1013, Phe1143, Ser1142                                                                                            | Tyr1141 (2.49), Glu1144 (2.51), Gln876 (3.03), Glu880 (2.85)                                 |
| Pyridoxamine (5)           | -5,56            | Pro1013, Phe1143, Ser1140, Pro1150                                                                                   | Thr1011 (2.84), Glu880 (2.96), Glu880 (2.44), Tyr1141 (3.10), Tyr1141 (2.71)                 |
| Pyridoxal (0)              | -5,67            | Ala1259, Val1260, Gly1261, Met1039, Gln1041, Phe799, Thr1078                                                         | Ala1084 (3.11), Ser1081 (2.59), Glu1262 (2.59), Ala1079 (2.87), Ser1083 (3.26)               |
| D-Glucosamine (0)          | -5,39            | Pro1013, Glu1144, Ser1142, Val1012                                                                                   | Thr1011 (2.56), Glu880 (2.43), Glu880 (2.80), Phe1143 (2.83), Tyr1141 (2.82), Tyr1141(2.75)  |
| D-Glucosamine (3)          | -6,17            | Pro1013, Phe1143, Thr1011, Asn1149, Gly1140, Leu1139, Phe884                                                         | Glu880 (3.23), Glu880 (2.62), Tyr1141 (2.79), Tyr1141 (2.89), Pro1150 (3.01), Pro1150 (2.64) |
| <b>ADA</b>                 |                  |                                                                                                                      |                                                                                              |
| Alliin (0)                 | -4,59            | Trp113, Leu58, Leu102, Asp15, Tyr98, His13, Phe61                                                                    | Ser99 (2.87), Arg97 (2.94)                                                                   |
| Alliin (9)                 | -5,43            | Thr265, Phe196, Asp292, Asp291, Ala179, Phe57, Leu54, Ser261                                                         | His13 (2.96), His234 (2.90), His11 (3.15), His210 (2.85), Gly180 (2.75), Gly180 (3.29)       |

|                         |       |                                                                                  |                                                                                                         |
|-------------------------|-------|----------------------------------------------------------------------------------|---------------------------------------------------------------------------------------------------------|
| Pyridoxamine (0)        | -6,66 | Cys149, Ser99, Arg97, Tyr98, Ala179, Phe61, Asp292, His13                        | Asp15 (2.68), Asp15 (2.72), His210 (2.83)                                                               |
| Pyridoxamine (8)        | -7,26 | Ser99, Tyr98, Leu103, Leu102, His13                                              | Leu14 (2.79), Arg97 (2.76), Asp15 (2.67)                                                                |
| ( <i>E</i> )-Ajoene (0) | -5,21 | Ala169, Glu213, Asp291, Asp292, His13, Phe57, Asp15, Leu103, Tyr98, Ser99, Arg97 | Gly180 (2.96), His210 (3.09)                                                                            |
| ( <i>E</i> )-Ajoene (5) | -5,74 | Asp292, His13, Phe57, Asp15, Leu103, Leu102, Tyr98, Arg97, Cys149, Phe61, Leu14  | Ser99 (2.66)                                                                                            |
| Pyridoxal (0)           | -5,53 | Leu102, Leu103, Leu14, Arg97, His13, Met151, Tyr98                               | Ser99 (2.74), Asp15 (2.80), Asp15 (3.04)                                                                |
| Pyridoxal (8)           | -6,04 | Leu102, Leu103, His13, Tyr98, Met65, Cys149, Asp15                               | Ser99 (2.59), Leu14 (2.71), Arg97 (2.66)                                                                |
| D-Glucosamine (0)       | -6,30 | Ala179, Leu54, Phe57, Phe296, His13, Glu213, Thr265                              | Gly180 (2.71), His210 (2.95), His234 (2.84), His11 (3.07), Asp291 (2.69)                                |
| D-Glucosamine (2)       | -6,80 | Ala179, Leu54, His13,                                                            | Gly180 (2.94), His210 (2.89), His234 (2.77), His11 (3.15), Asp291 (2.69), Glu213 (2.40), Glu213 (3.07)  |
| <b>GDA</b>              |       |                                                                                  |                                                                                                         |
| Pyridoxamine (0)        | -5,43 | Asn166, Thr168, Ser209 Leu165                                                    | Leu208 (3.00), Asp167 (2.42), Asp167 (3.24)                                                             |
| Pyridoxamine (5)        | -5,95 | Asn166, Thr168, Ser209 Leu165                                                    | Leu208 (2.61), Asp167 (2.48), Asp167 (2.69)                                                             |
| D-Glucosamine (0)       | -5,07 | Leu92, Phe206, Asn166, Leu165, Ser209                                            | Thr168 (2.88), Asp167 (2.83), Asp167 (3.31), Asp167 (2.72), Leu208 (2.85)                               |
| D-Glucosamine (4)       | -5,86 | Phe206, Ser209, Leu246                                                           | Thr168 (3.33), Thr168 (2.90), Asp167 (2.55), Leu208 (2.80), Leu208 (2.93), Leu165 (3.18), Asn166 (2.97) |

**PNP**

|                             |       |                                |                                                                           |
|-----------------------------|-------|--------------------------------|---------------------------------------------------------------------------|
| Pyridoxamine (0)            | -6,33 | Met217, Phe198, Glu199, Ala115 | Gly116 (2.72), Val215 (2.75), Ser197 (2.60), Pro196 (2.59)                |
| <b>NT5C2-1497</b>           |       |                                |                                                                           |
| 4-Guanidinobutyric acid (0) | -5,10 | Met453, Asp457                 | Lys359 (2.90), Asn36 (2.51), Arg37 (2.92)                                 |
| 4-Guanidinobutyric acid (5) | -5,49 | Met453, Ala456, Arg454         | Lys359 (2.83), Asn36 (2.56), Arg37 (3.19), Asp457 (2.79)                  |
| Pyridoxamine (0)            | -4,31 | Asp143                         | Thr145 (3.30), Thr145 (2.87), Glu146 (3.03), Asp144 (2.76)                |
| Pyridoxamine (9)            | -5,23 | Glu146, Asp143, Gln141         | Asp144 (2.59), Thr145 (3.07), Thr145 (2.80), Thr145 (2.83)                |
| <b>NT5C2-1498</b>           |       |                                |                                                                           |
| Glucosamine (0)             | -4,19 | Arg132                         | Pro129 (2.90), Glu130 (2.66), Glu130 (2.93), Glu133 (2.60)                |
| Glucosamine (4)             | -5,18 | Arg132                         | Pro129 (2.85), Glu130 (2.51), Glu130 (2.93), Glu133 (2.69), Glu133 (2.51) |
